# Supplementary material
Source: publisher site journal article supplement (http://www.spandidos-publications.com/3399/downloadSupplementary)
Supplement: Supplementary file 1 [file downloadSupplementary]

## Sheet: compound-target
Table SI. Target genes and compounds associated with Buyang Huanwu Decoction.
Mol ID	Molecule Name	Gene name	Unique gene
MOL001771	poriferast-5-en-3beta-ol	PGR	PGR
MOL001771	poriferast-5-en-3beta-ol	NCOA2	NCOA2
MOL002695	lignan	ESR1	ESR1
MOL002695	lignan	F10	F10
MOL002695	lignan	PTGS2	PTGS2
MOL002695	lignan	CA2	CA2
MOL002695	lignan	TOP2B	TOP2B
MOL002695	lignan	NCOA2	KCNMA1
MOL002695	lignan	KCNMA1	CALM1
MOL002695	lignan	CALM1	ESR2
MOL002706	Phytoene	ESR1	NOS2
MOL002706	Phytoene	ESR2	PTGS1
MOL002707	phytofluene	ESR1	AR
MOL002707	phytofluene	ESR2	PPARG
MOL002710	Pyrethrin II	PTGS2	HSP90AB1
MOL002710	Pyrethrin II	NCOA2	PIK3CG
MOL002712	6-Hydroxykaempferol	NOS2	PRSS1
MOL002712	6-Hydroxykaempferol	PTGS1	DPP4
MOL002712	6-Hydroxykaempferol	AR	TGFB1
MOL002712	6-Hydroxykaempferol	PPARG	CYP1A1
MOL002712	6-Hydroxykaempferol	PTGS2	AHR
MOL002712	6-Hydroxykaempferol	HSP90AB1	CCND1
MOL002712	6-Hydroxykaempferol	PIK3CG	ACTA2
MOL002712	6-Hydroxykaempferol	PRSS1	CYP1B1
MOL002712	6-Hydroxykaempferol	NCOA2	HMOX1
MOL002712	6-Hydroxykaempferol	DPP4	RELA
MOL002714	baicalein	TGFB1	AKT1
MOL002714	baicalein	CYP1A1	ALOX12
MOL002714	baicalein	AHR	CYP1A2
MOL002714	baicalein	CCND1	BIRC5
MOL002714	baicalein	NOS2	CDK1
MOL002714	baicalein	ACTA2	CYP3A4
MOL002714	baicalein	CYP1B1	MMP9
MOL002714	baicalein	HMOX1	RB1
MOL002714	baicalein	RELA	AFP
MOL002714	baicalein	AKT1	BAX
MOL002714	baicalein	ALOX12	CEBPA
MOL002714	baicalein	CYP1A2	CYP2C9
MOL002714	baicalein	BIRC5	EGF
MOL002714	baicalein	CDK1	GLI1
MOL002714	baicalein	CYP3A4	HES1
MOL002714	baicalein	MMP9	HEY1
MOL002714	baicalein	RB1	HEY2
MOL002714	baicalein	AFP	HSD11B2
MOL002714	baicalein	BAX	INS
MOL002714	baicalein	CEBPA	MAPK1
MOL002714	baicalein	CYP2C9	MAPK3
MOL002714	baicalein	EGF	MIR21
MOL002714	baicalein	GLI1	MMP2
MOL002714	baicalein	HES1	NAT1
MOL002714	baicalein	HEY1	NFKBIA
MOL002714	baicalein	HEY2	NKILA
MOL002714	baicalein	HSD11B2	NOTCH1
MOL002714	baicalein	INS	SPRY1
MOL002714	baicalein	MAPK1	SREBF1
MOL002714	baicalein	MAPK3	TNF
MOL002714	baicalein	MIR21	ABCB1
MOL002714	baicalein	MMP2	ABCC1
MOL002714	baicalein	NAT1	ALOX15
MOL002714	baicalein	NFKBIA	APP
MOL002714	baicalein	NKILA	BCL2
MOL002714	baicalein	NOTCH1	CASP3
MOL002714	baicalein	PPARG	CASP8
MOL002714	baicalein	PTGS2	CCNA2
MOL002714	baicalein	SPRY1	CCNB1
MOL002714	baicalein	SREBF1	CCNE1
MOL002714	baicalein	TNF	CDK4
MOL002714	baicalein	ABCB1	CEBPB
MOL002714	baicalein	ABCC1	CEBPG
MOL002714	baicalein	ALOX15	CFLAR
MOL002714	baicalein	APP	CFTR
MOL002714	baicalein	BCL2	COL1A1
MOL002714	baicalein	CASP3	COL1A2
MOL002714	baicalein	CASP8	CSF2
MOL002714	baicalein	CCNA2	CYCS
MOL002714	baicalein	CCNB1	CYP2B6
MOL002714	baicalein	CCNE1	CYP2C19
MOL002714	baicalein	CDK4	CYP2E1
MOL002714	baicalein	CEBPB	DGAT1
MOL002714	baicalein	CEBPG	DLK1
MOL002714	baicalein	CFLAR	EGFR
MOL002714	baicalein	CFTR	EGR2
MOL002714	baicalein	COL1A1	ELK1
MOL002714	baicalein	COL1A2	FABP11A
MOL002714	baicalein	CSF2	FABP11B
MOL002714	baicalein	CYCS	FABP4
MOL002714	baicalein	CYP2B6	FASN
MOL002714	baicalein	CYP2C19	FN1
MOL002714	baicalein	CYP2E1	GPAT3
MOL002714	baicalein	DGAT1	GSK3B
MOL002714	baicalein	DLK1	IGF1
MOL002714	baicalein	EGFR	IL1B
MOL002714	baicalein	EGR2	JUN
MOL002714	baicalein	ELK1	KLF2
MOL002714	baicalein	FABP11A	KLF5
MOL002714	baicalein	FABP11B	LPIN1
MOL002714	baicalein	FABP4	MAPK8
MOL002714	baicalein	FASN	MPO
MOL002714	baicalein	FN1	MTOR
MOL002714	baicalein	GPAT3	NFKB1
MOL002714	baicalein	GSK3B	NFKBIB
MOL002714	baicalein	IGF1	NR1I3
MOL002714	baicalein	IL1B	PKM
MOL002714	baicalein	JUN	PLAU
MOL002714	baicalein	KLF2	PMAIP1
MOL002714	baicalein	KLF5	PRKCA
MOL002714	baicalein	LPIN1	RPS6KB1
MOL002714	baicalein	MAPK8	SREBF2
MOL002714	baicalein	MPO	STAT3
MOL002714	baicalein	MTOR	TP53
MOL002714	baicalein	NFKB1	UGT2B15
MOL002714	baicalein	NFKBIB	VEGFA
MOL002714	baicalein	NR1I3	XIAP
MOL002714	baicalein	PKM	BCO1
MOL002714	baicalein	PLAU	GJA1
MOL002714	baicalein	PMAIP1	BCO2
MOL002714	baicalein	PRKCA	CAT
MOL002714	baicalein	RPS6KB1	SOD2
MOL002714	baicalein	SREBF2	CDH1
MOL002714	baicalein	STAT3	CYP26A1
MOL002714	baicalein	TP53	IRX4
MOL002714	baicalein	UGT2B15	NR1I2
MOL002714	baicalein	VEGFA	PDGFRB
MOL002714	baicalein	XIAP	RBP4
MOL002717	qt_carthamone	PTGS1	ACAD9
MOL002717	qt_carthamone	PTGS2	ADH1A
MOL002717	qt_carthamone	HSP90AB1	ADH5
MOL002721	quercetagetin	AR	ADIPOQ
MOL002721	quercetagetin	PPARG	AEBP1
MOL002721	quercetagetin	PTGS2	ALAD
MOL002721	quercetagetin	HSP90AB1	ALDH3B1
MOL002721	quercetagetin	PPARG	ALDH4A1
MOL002721	quercetagetin	DPP4	ANK2
MOL002721	quercetagetin	PRSS1	ANK3
MOL002721	quercetagetin	TOP2B	APPBP2
MOL002773	beta-carotene	BCO1	ARHGAP26
MOL002773	beta-carotene	TNF	ASAH1
MOL002773	beta-carotene	BAX	ASB1
MOL002773	beta-carotene	GJA1	ASB9
MOL002773	beta-carotene	IL1B	ATP8B1
MOL002773	beta-carotene	BCO2	BAG3
MOL002773	beta-carotene	CCND1	BAG4
MOL002773	beta-carotene	CASP3	BAG5
MOL002773	beta-carotene	CAT	CAV1
MOL002773	beta-carotene	ESR1	CDCA8
MOL002773	beta-carotene	MAPK1	CENPE
MOL002773	beta-carotene	MAPK3	CLCN3
MOL002773	beta-carotene	SOD2	IL6
MOL002773	beta-carotene	CDH1	ACHE
MOL002773	beta-carotene	CYP1A2	TLR4
MOL002773	beta-carotene	CYP26A1	TXNIP
MOL002773	beta-carotene	ESR2	ABCC2
MOL002773	beta-carotene	IRX4	ALOX5
MOL002773	beta-carotene	JUN	ATF2
MOL002773	beta-carotene	NR1I2	ERN1
MOL002773	beta-carotene	PDGFRB	GOT1
MOL002773	beta-carotene	RBP4	GPT
MOL002773	beta-carotene	TP53	MYD88
MOL002773	beta-carotene	ACAD9	NLRP3
MOL002773	beta-carotene	ADH1A	PRIMA1
MOL002773	beta-carotene	ADH5	APOA1
MOL002773	beta-carotene	ADIPOQ	APOB
MOL002773	beta-carotene	AEBP1	BIRC2
MOL002773	beta-carotene	AKT1	CASP9
MOL002773	beta-carotene	ALAD	CLEC4E
MOL002773	beta-carotene	ALDH3B1	FAM102A
MOL002773	beta-carotene	ALDH4A1	LDLR
MOL002773	beta-carotene	ANK2	PARP1
MOL002773	beta-carotene	ANK3	IL32
MOL002773	beta-carotene	APPBP2	ARNT
MOL002773	beta-carotene	ARHGAP26	IFNG
MOL002773	beta-carotene	ASAH1	NFE2L2
MOL002773	beta-carotene	ASB1	APOE
MOL002773	beta-carotene	ASB9	BBC3
MOL002773	beta-carotene	ATP8B1	CXCL8
MOL002773	beta-carotene	BAG3	GREB1
MOL002773	beta-carotene	BAG4	ICAM1
MOL002773	beta-carotene	BAG5	INS1
MOL002773	beta-carotene	BCL2	TP53I3
MOL002773	beta-carotene	CAV1	CCL2
MOL002773	beta-carotene	CDCA8	CD44
MOL002773	beta-carotene	CEBPA	DIO2
MOL002773	beta-carotene	CENPE	SLC2A1
MOL002773	beta-carotene	CFLAR	SOD1
MOL002773	beta-carotene	CLCN3	TFF1
MOL002776	Baicalin	CYP1A2	TNFSF11
MOL002776	Baicalin	NOS2	TSLP
MOL002776	Baicalin	CYP1A1	ATM
MOL002776	Baicalin	TNF	BCL2L1
MOL002776	Baicalin	HMOX1	BMP2
MOL002776	Baicalin	CCND1	CCN5
MOL002776	Baicalin	IL6	CD14
MOL002776	Baicalin	ACHE	CDKN1A
MOL002776	Baicalin	AHR	CRP
MOL002776	Baicalin	BAX	FOS
MOL002776	Baicalin	EGF	GADD45B
MOL002776	Baicalin	HES1	GCLC
MOL002776	Baicalin	HEY1	H2AFX
MOL002776	Baicalin	HEY2	HGF
MOL002776	Baicalin	NOTCH1	IL5
MOL002776	Baicalin	PTGS2	ITGAM
MOL002776	Baicalin	TLR4	MUC5AC
MOL002776	Baicalin	TXNIP	NQO1
MOL002776	Baicalin	ABCC2	POU5F1
MOL002776	Baicalin	ALOX5	SELE
MOL002776	Baicalin	ATF2	SFN
MOL002776	Baicalin	BCL2	SLC16A1
MOL002776	Baicalin	CASP3	SLCO1B1
MOL002776	Baicalin	CCNA2	SPP1
MOL002776	Baicalin	COL1A2	TP63
MOL002776	Baicalin	EGFR	TP73
MOL002776	Baicalin	ELK1	UGT1A1
MOL002776	Baicalin	ERN1	UGT1A3
MOL002776	Baicalin	GOT1	XDH
MOL002776	Baicalin	GPT	AIP
MOL002776	Baicalin	IL1B	B3GALT5
MOL002776	Baicalin	MYD88	BCL2A1
MOL002776	Baicalin	NFKBIA	BMP4
MOL002776	Baicalin	NLRP3	CALCR
MOL002776	Baicalin	PKM	CASP1
MOL002776	Baicalin	PPARG	CCKAR
MOL002776	Baicalin	PRIMA1	CCL5
MOL002776	Baicalin	RELA	CDKN2C
MOL002776	Baicalin	TGFB1	CHEK1
MOL002776	Baicalin	TP53	CHEK2
MOL000358	beta-sitosterol	BAX	CHUK
MOL000358	beta-sitosterol	BCL2	COL10A1
MOL000358	beta-sitosterol	ESR1	COL2A1
MOL000358	beta-sitosterol	ESR2	CTNNB1
MOL000358	beta-sitosterol	APOA1	CYCB
MOL000358	beta-sitosterol	APOB	DHRS4
MOL000358	beta-sitosterol	BIRC2	DUOX1
MOL000358	beta-sitosterol	CASP3	EP300
MOL000358	beta-sitosterol	CASP9	FBP1
MOL000358	beta-sitosterol	CAT	GSTA1
MOL000358	beta-sitosterol	CLEC4E	GSTM2
MOL000358	beta-sitosterol	CYCS	GSTP1
MOL000358	beta-sitosterol	FAM102A	HBB
MOL000358	beta-sitosterol	LDLR	HIF1A
MOL000358	beta-sitosterol	PARP1	IL4
MOL000422	kaempferol	CYP1A1	KMT2A
MOL000422	kaempferol	TNF	LAMB2
MOL000422	kaempferol	ESR1	MAPK9
MOL000422	kaempferol	AHR	MET
MOL000422	kaempferol	NOS2	MOD2
MOL000422	kaempferol	IL32	MT2A
MOL000422	kaempferol	ESR2	NANOG
MOL000422	kaempferol	IL1B	NCOA3
MOL000422	kaempferol	CSF2	NOX4
MOL000422	kaempferol	CASP3	PCNA
MOL000422	kaempferol	CYP1B1	PPARGC1A
MOL000422	kaempferol	MAPK1	PSCA
MOL000422	kaempferol	MAPK3	PTGES
MOL000422	kaempferol	HMOX1	PYCARD
MOL000422	kaempferol	PTGS2	RIPK1
MOL000422	kaempferol	ARNT	RPA3
MOL000422	kaempferol	CYP1A2	RUNX2
MOL000422	kaempferol	PPARG	SLC2A4
MOL000422	kaempferol	TP53	SLCO1B3
MOL000422	kaempferol	NR1I2	SLCO2B1
MOL000422	kaempferol	ABCC1	SOX9
MOL000422	kaempferol	CYP3A4	STAT1
MOL000422	kaempferol	IFNG	STAT2
MOL000422	kaempferol	IL6	TFAM
MOL000422	kaempferol	NFE2L2	TGFA
MOL000422	kaempferol	ABCB1	TK1
MOL000422	kaempferol	AKT1	TNFAIP3
MOL000422	kaempferol	APOE	TNFRSF11A
MOL000422	kaempferol	BAX	TUBB3
MOL000422	kaempferol	BBC3	UCP3
MOL000422	kaempferol	CCNB1	UGT1A10
MOL000422	kaempferol	CXCL8	UGT1A7
MOL000422	kaempferol	GREB1	UGT1A8
MOL000422	kaempferol	ICAM1	UGT1A9
MOL000422	kaempferol	INS1	UTRN
MOL000422	kaempferol	PGR	VCAM1
MOL000422	kaempferol	TP53I3	VDR
MOL000422	kaempferol	AFP	NR1H4
MOL000422	kaempferol	CCL2	NR0B1
MOL000422	kaempferol	CD44	KNG1
MOL000422	kaempferol	DIO2	ZBTB16
MOL000422	kaempferol	JUN	ABCG5
MOL000422	kaempferol	MMP2	HMGCR
MOL000422	kaempferol	PARP1	ABCG8
MOL000422	kaempferol	RELA	ACAT1
MOL000422	kaempferol	SLC2A1	GFRA1
MOL000422	kaempferol	SOD1	STRA8
MOL000422	kaempferol	SOD2	ABCB11
MOL000422	kaempferol	TFF1	CLDN11
MOL000422	kaempferol	TNFSF11	DNMT3L
MOL000422	kaempferol	TSLP	NPC1L1
MOL000422	kaempferol	ALOX12	ANKRD1
MOL000422	kaempferol	ATM	BRINP3
MOL000422	kaempferol	BCL2L1	FSHR
MOL000422	kaempferol	BMP2	GABARAP
MOL000422	kaempferol	CASP9	HOXA5
MOL000422	kaempferol	CAT	IFI35
MOL000422	kaempferol	CCN5	IL10
MOL000422	kaempferol	CD14	MYBPC2
MOL000422	kaempferol	CDKN1A	NR0B2
MOL000422	kaempferol	CRP	PTPN1
MOL000422	kaempferol	CYCS	RPL18A
MOL000422	kaempferol	CYP2C9	RPL31
MOL000422	kaempferol	FOS	RPL36
MOL000422	kaempferol	GADD45B	RPPH1
MOL000422	kaempferol	GCLC	RPS14
MOL000422	kaempferol	H2AFX	RPS27
MOL000422	kaempferol	HGF	RPS27RT
MOL000422	kaempferol	IL5	RPS7
MOL000422	kaempferol	ITGAM	TM2D3
MOL000422	kaempferol	MUC5AC	IRF3
MOL000422	kaempferol	NFKBIA	MAOA
MOL000422	kaempferol	NQO1	PTK2
MOL000422	kaempferol	POU5F1	CD40
MOL000422	kaempferol	SELE	TNFSF10
MOL000422	kaempferol	SFN	CDH2
MOL000422	kaempferol	SLC16A1	CDK2
MOL000422	kaempferol	SLCO1B1	CXCL10
MOL000422	kaempferol	SPP1	CXCL9
MOL000422	kaempferol	TP63	GCLM
MOL000422	kaempferol	TP73	IFNB1
MOL000422	kaempferol	UGT1A1	IL12B
MOL000422	kaempferol	UGT1A3	IL27
MOL000422	kaempferol	XDH	MMP1
MOL000422	kaempferol	ACTA2	SLC5A1
MOL000422	kaempferol	AIP	TBK1
MOL000422	kaempferol	ALOX5	TYR
MOL000422	kaempferol	APP	ABCC4
MOL000422	kaempferol	AR	ABCG2
MOL000422	kaempferol	B3GALT5	ACE
MOL000422	kaempferol	BCL2	AGER
MOL000422	kaempferol	BCL2A1	CASP7
MOL000422	kaempferol	BMP4	CD40LG
MOL000422	kaempferol	CALCR	CD74
MOL000422	kaempferol	CASP1	CDKN1B
MOL000422	kaempferol	CCKAR	CYP3A5
MOL000422	kaempferol	CCL5	EGR1
MOL000422	kaempferol	CCND1	FGF2
MOL000422	kaempferol	CDK1	FOSB
MOL000422	kaempferol	CDKN2C	GFAP
MOL000422	kaempferol	CFTR	GPR35
MOL000422	kaempferol	CHEK1	GPX1
MOL000422	kaempferol	CHEK2	HBEGF
MOL000422	kaempferol	CHUK	IL13
MOL000422	kaempferol	COL10A1	IL17A
MOL000422	kaempferol	COL2A1	IL3
MOL000422	kaempferol	CTNNB1	INSR
MOL000422	kaempferol	CYCB	JUNB
MOL000422	kaempferol	CYP2E1	JUND
MOL000422	kaempferol	DHRS4	MAPK10
MOL000422	kaempferol	DUOX1	MDM2
MOL000422	kaempferol	EP300	MMP13
MOL000422	kaempferol	FBP1	NFAT5
MOL000422	kaempferol	FN1	NLRP1A
MOL000422	kaempferol	GPT	NOS3
MOL000422	kaempferol	GSTA1	NR1D1
MOL000422	kaempferol	GSTM2	P2RX4
MOL000422	kaempferol	GSTP1	PLK1
MOL000422	kaempferol	HBB	SLC2A3
MOL000422	kaempferol	HIF1A	TOP1
MOL000422	kaempferol	IL4	TRP53
MOL000422	kaempferol	KMT2A	VAV3
MOL000422	kaempferol	LAMB2	NR3C2
MOL000422	kaempferol	MAPK8	GSR
MOL000422	kaempferol	MAPK9	SP1
MOL000422	kaempferol	MET	HSPA5
MOL000422	kaempferol	MOD2	AGT
MOL000422	kaempferol	MT2A	DDIT3
MOL000422	kaempferol	NANOG	MCL1
MOL000422	kaempferol	NCOA3	ERBB2
MOL000422	kaempferol	NOX4	SIRT1
MOL000422	kaempferol	NR1I3	PRKAA1
MOL000422	kaempferol	PCNA	BAD
MOL000422	kaempferol	PPARGC1A	NCF1
MOL000422	kaempferol	PSCA	TNFRSF10B
MOL000422	kaempferol	PTGES	ABCA1
MOL000422	kaempferol	PYCARD	BGLAP
MOL000422	kaempferol	RIPK1	HMGB1
MOL000422	kaempferol	RPA3	PPARA
MOL000422	kaempferol	RUNX2	FAS
MOL000422	kaempferol	SLC2A4	PON1
MOL000422	kaempferol	SLCO1B3	XBP1
MOL000422	kaempferol	SLCO2B1	BID
MOL000422	kaempferol	SOX9	CD36
MOL000422	kaempferol	STAT1	LEP
MOL000422	kaempferol	STAT2	S100B
MOL000422	kaempferol	TFAM	ALB
MOL000422	kaempferol	TGFA	CXCL2
MOL000422	kaempferol	TK1	EDN1
MOL000422	kaempferol	TNFAIP3	PLAT
MOL000422	kaempferol	TNFRSF11A	CREB1
MOL000422	kaempferol	TUBB3	FASLG
MOL000422	kaempferol	UCP3	HSPA1A
MOL000422	kaempferol	UGT1A10	IRS1
MOL000422	kaempferol	UGT1A7	PRKCD
MOL000422	kaempferol	UGT1A8	SERPINE1
MOL000422	kaempferol	UGT1A9	SLC22A6
MOL000422	kaempferol	UTRN	TIMP1
MOL000422	kaempferol	VCAM1	TOLLIP
MOL000422	kaempferol	VDR	PDCD4
MOL000422	kaempferol	VEGFA	POMC
MOL000449	Stigmasterol	NR1H4	TFRC
MOL000449	Stigmasterol	NR0B1	TLR7
MOL000449	Stigmasterol	KNG1	JAK2
MOL000449	Stigmasterol	ZBTB16	KLK3
MOL000449	Stigmasterol	ABCG5	MIR27A
MOL000449	Stigmasterol	HMGCR	MYC
MOL000449	Stigmasterol	ABCG8	ITGB3
MOL000449	Stigmasterol	ACAT1	PRKACA
MOL000449	Stigmasterol	APOA1	SCN5A
MOL000449	Stigmasterol	GFRA1	CYP2B1
MOL000449	Stigmasterol	NANOG	SMAD3
MOL000449	Stigmasterol	STRA8	CCL3
MOL000449	Stigmasterol	ABCB11	MIR155
MOL000449	Stigmasterol	CLDN11	OLR1
MOL000449	Stigmasterol	DNMT3L	PECAM1
MOL000449	Stigmasterol	ESR1	PON2
MOL000449	Stigmasterol	NPC1L1	PPARD
MOL000449	Stigmasterol	ANKRD1	SESN2
MOL000449	Stigmasterol	BRINP3	SMAD2
MOL000449	Stigmasterol	CXCL8	RORA
MOL000449	Stigmasterol	FSHR	RORC
MOL000449	Stigmasterol	GABARAP	CYP19A1B
MOL000449	Stigmasterol	HOXA5	CYP2D6
MOL000449	Stigmasterol	IFI35	EPO
MOL000449	Stigmasterol	IL10	HAVCR1
MOL000449	Stigmasterol	MYBPC2	MDM4
MOL000449	Stigmasterol	NR0B2	SLC22A2
MOL000449	Stigmasterol	PTPN1	VTG1
MOL000449	Stigmasterol	RPL18A	ABHD14B
MOL000449	Stigmasterol	RPL31	BLVRB
MOL000449	Stigmasterol	RPL36	CCND3
MOL000449	Stigmasterol	RPPH1	CCNG1
MOL000449	Stigmasterol	RPS14	CDK7
MOL000449	Stigmasterol	RPS27	CDKN1C
MOL000449	Stigmasterol	RPS27RT	CDKN2D
MOL000449	Stigmasterol	RPS7	ERP29
MOL000449	Stigmasterol	SLCO1B1	FLT1
MOL000449	Stigmasterol	TM2D3	KRT1
MOL000449	Stigmasterol	TNF	LASP1
MOL000006	luteolin	TNF	MCM5
MOL000006	luteolin	IL1B	MCM6
MOL000006	luteolin	AKT1	NME1
MOL000006	luteolin	CYP1A1	PEBP1
MOL000006	luteolin	MAPK1	PGAM1
MOL000006	luteolin	MAPK3	PNPO
MOL000006	luteolin	CASP3	PRDX1
MOL000006	luteolin	IL6	PRDX2
MOL000006	luteolin	PTGS2	RAD9A
MOL000006	luteolin	EGF	RBX1
MOL000006	luteolin	EGFR	SKP1
MOL000006	luteolin	IFNG	SKP2
MOL000006	luteolin	MMP9	STIP1
MOL000006	luteolin	RELA	TAGLN2
MOL000006	luteolin	NFKBIA	UBE3A
MOL000006	luteolin	HIF1A	UGT2B7
MOL000006	luteolin	INS1	ATP2A2
MOL000006	luteolin	JUN	BCS1L
MOL000006	luteolin	NOS2	PLN
MOL000006	luteolin	VEGFA	ADRA2A
MOL000006	luteolin	BCL2	SLC6A2
MOL000006	luteolin	CASP9	ADRA1A
MOL000006	luteolin	CCNB1	SLC6A3
MOL000006	luteolin	CDKN1A	ADRB2
MOL000006	luteolin	IRF3	LTA4H
MOL000006	luteolin	MAOA	MAOB
MOL000006	luteolin	BAX	CTRB1
MOL000006	luteolin	CASP8	ADRA2B
MOL000006	luteolin	CYP1B1	PGR
MOL000006	luteolin	FOS	AR
MOL000006	luteolin	HMOX1	VEGFA
MOL000006	luteolin	ICAM1	NFKBIA
MOL000006	luteolin	IL4	PRKCB
MOL000006	luteolin	MAPK8	IGF2
MOL000006	luteolin	PTK2	GSTM1
MOL000006	luteolin	STAT3	GSTM2
MOL000006	luteolin	TP53I3	GSTA2
MOL000006	luteolin	AHR	GABRA1
MOL000006	luteolin	CD40	TNF
MOL000006	luteolin	ESR1	LBP
MOL000006	luteolin	GCLC	HAS2
MOL000006	luteolin	NFE2L2	PGR
MOL000006	luteolin	TNFSF10	PTGS2
MOL000006	luteolin	ABCC1	RXRA
MOL000006	luteolin	ABCC2	NR3C1
MOL000006	luteolin	ACTA2	TBXAS1
MOL000006	luteolin	BCL2L1	ITGA2B
MOL000006	luteolin	CAT	KL
MOL000006	luteolin	CCL2	FOXO1
MOL000006	luteolin	CDH1	HSF1
MOL000006	luteolin	CDH2	IGF1R
MOL000006	luteolin	CDK2	MAPT
MOL000006	luteolin	CSF2	ADH1C
MOL000006	luteolin	CXCL10	GABRA6
MOL000006	luteolin	CXCL8	CALM
MOL000006	luteolin	CXCL9	GABRA2
MOL000006	luteolin	CYP3A4	GABRA3
MOL000006	luteolin	ESR2	CHRM2
MOL000006	luteolin	GADD45B	GRIA2
MOL000006	luteolin	GCLM	CHRNA7
MOL000006	luteolin	IFNB1	GRIA2
MOL000006	luteolin	IL10	CHRM3
MOL000006	luteolin	IL12B	CHRM1
MOL000006	luteolin	IL27	ADRA1B
MOL000006	luteolin	MAPK9	GABRA5
MOL000006	luteolin	MMP1	IGHG1
MOL000006	luteolin	NFKB1	ADH1B
MOL000006	luteolin	PARP1	ADH1C
MOL000006	luteolin	PSCA	LYZ
MOL000006	luteolin	SELE	PDE3A
MOL000006	luteolin	SFN	PNP
MOL000006	luteolin	SLC16A1	SLC6A2
MOL000006	luteolin	SLC5A1	TRPM5
MOL000006	luteolin	SOD1	RXRG
MOL000006	luteolin	TBK1	MAP1LC3A
MOL000006	luteolin	TP63	ATF4
MOL000006	luteolin	TP73	CASP4
MOL000006	luteolin	TYR	EIF2S1
MOL000006	luteolin	UGT1A1
MOL000006	luteolin	UGT1A3
MOL000006	luteolin	VCAM1
MOL000006	luteolin	XDH
MOL000006	luteolin	ABCC4
MOL000006	luteolin	ABCG2
MOL000006	luteolin	ACE
MOL000006	luteolin	AGER
MOL000006	luteolin	ALOX5
MOL000006	luteolin	BIRC2
MOL000006	luteolin	CASP1
MOL000006	luteolin	CASP7
MOL000006	luteolin	CCN5
MOL000006	luteolin	CCNA2
MOL000006	luteolin	CD40LG
MOL000006	luteolin	CD74
MOL000006	luteolin	CDK1
MOL000006	luteolin	CDKN1B
MOL000006	luteolin	CDKN2C
MOL000006	luteolin	CHUK
MOL000006	luteolin	CYP1A2
MOL000006	luteolin	CYP2C19
MOL000006	luteolin	CYP2C9
MOL000006	luteolin	CYP2E1
MOL000006	luteolin	CYP3A5
MOL000006	luteolin	EGR1
MOL000006	luteolin	FBP1
MOL000006	luteolin	FGF2
MOL000006	luteolin	FOSB
MOL000006	luteolin	GFAP
MOL000006	luteolin	GPR35
MOL000006	luteolin	GPX1
MOL000006	luteolin	HBEGF
MOL000006	luteolin	IL13
MOL000006	luteolin	IL17A
MOL000006	luteolin	IL3
MOL000006	luteolin	IL5
MOL000006	luteolin	INSR
MOL000006	luteolin	JUNB
MOL000006	luteolin	JUND
MOL000006	luteolin	MAPK10
MOL000006	luteolin	MDM2
MOL000006	luteolin	MMP13
MOL000006	luteolin	MPO
MOL000006	luteolin	NFAT5
MOL000006	luteolin	NFKBIB
MOL000006	luteolin	NLRP1A
MOL000006	luteolin	NOS3
MOL000006	luteolin	NR1D1
MOL000006	luteolin	P2RX4
MOL000006	luteolin	PKM
MOL000006	luteolin	PLK1
MOL000006	luteolin	PRKCA
MOL000006	luteolin	PYCARD
MOL000006	luteolin	SLC2A3
MOL000006	luteolin	SLC2A4
MOL000006	luteolin	TGFB1
MOL000006	luteolin	TNFAIP3
MOL000006	luteolin	TOP1
MOL000006	luteolin	TP53
MOL000006	luteolin	TRP53
MOL000006	luteolin	VAV3
MOL000006	luteolin	XIAP
MOL000953	CLR	PGR
MOL000953	CLR	NR3C2
MOL000953	CLR	NCOA2
MOL000098	quercetin	TNF
MOL000098	quercetin	CASP3
MOL000098	quercetin	HMOX1
MOL000098	quercetin	IL1B
MOL000098	quercetin	NOS2
MOL000098	quercetin	MAPK3
MOL000098	quercetin	NFE2L2
MOL000098	quercetin	MAPK1
MOL000098	quercetin	AKT1
MOL000098	quercetin	BCL2
MOL000098	quercetin	IL6
MOL000098	quercetin	PTGS2
MOL000098	quercetin	BAX
MOL000098	quercetin	CAT
MOL000098	quercetin	CYP1A1
MOL000098	quercetin	PARP1
MOL000098	quercetin	RELA
MOL000098	quercetin	CASP9
MOL000098	quercetin	TNFSF10
MOL000098	quercetin	IFNG
MOL000098	quercetin	INS1
MOL000098	quercetin	VEGFA
MOL000098	quercetin	TP53
MOL000098	quercetin	MMP9
MOL000098	quercetin	AR
MOL000098	quercetin	CCL2
MOL000098	quercetin	NFKBIA
MOL000098	quercetin	TGFB1
MOL000098	quercetin	CDKN1A
MOL000098	quercetin	CXCL8
MOL000098	quercetin	GCLC
MOL000098	quercetin	JUN
MOL000098	quercetin	CASP8
MOL000098	quercetin	AHR
MOL000098	quercetin	ESR1
MOL000098	quercetin	GSR
MOL000098	quercetin	CCND1
MOL000098	quercetin	ICAM1
MOL000098	quercetin	SOD1
MOL000098	quercetin	BCL2L1
MOL000098	quercetin	FOS
MOL000098	quercetin	HIF1A
MOL000098	quercetin	BIRC5
MOL000098	quercetin	SP1
MOL000098	quercetin	TLR4
MOL000098	quercetin	ABCB1
MOL000098	quercetin	MMP2
MOL000098	quercetin	ABCC1
MOL000098	quercetin	HSPA5
MOL000098	quercetin	AGT
MOL000098	quercetin	DDIT3
MOL000098	quercetin	MCL1
MOL000098	quercetin	NOS3
MOL000098	quercetin	NQO1
MOL000098	quercetin	SOD2
MOL000098	quercetin	STAT3
MOL000098	quercetin	CYP1A2
MOL000098	quercetin	COL1A1
MOL000098	quercetin	EGFR
MOL000098	quercetin	PPARG
MOL000098	quercetin	EGF
MOL000098	quercetin	ESR2
MOL000098	quercetin	TGFA
MOL000098	quercetin	CYP3A4
MOL000098	quercetin	ERBB2
MOL000098	quercetin	INS
MOL000098	quercetin	SIRT1
MOL000098	quercetin	VCAM1
MOL000098	quercetin	ACTA2
MOL000098	quercetin	EGR1
MOL000098	quercetin	PRKAA1
MOL000098	quercetin	BAD
MOL000098	quercetin	CCNB1
MOL000098	quercetin	CTNNB1
MOL000098	quercetin	CXCL10
MOL000098	quercetin	GCLM
MOL000098	quercetin	NCF1
MOL000098	quercetin	NFKB1
MOL000098	quercetin	TNFRSF10B
MOL000098	quercetin	TYR
MOL000098	quercetin	ABCA1
MOL000098	quercetin	BGLAP
MOL000098	quercetin	CYP1B1
MOL000098	quercetin	FASN
MOL000098	quercetin	GPX1
MOL000098	quercetin	HMGB1
MOL000098	quercetin	ALOX15
MOL000098	quercetin	CSF2
MOL000098	quercetin	PPARA
MOL000098	quercetin	CAV1
MOL000098	quercetin	CYP2E1
MOL000098	quercetin	FAS
MOL000098	quercetin	MAPK8
MOL000098	quercetin	MIR21
MOL000098	quercetin	PON1
MOL000098	quercetin	XBP1
MOL000098	quercetin	APP
MOL000098	quercetin	BID
MOL000098	quercetin	CD36
MOL000098	quercetin	CYCS
MOL000098	quercetin	GPT
MOL000098	quercetin	LEP
MOL000098	quercetin	MTOR
MOL000098	quercetin	S100B
MOL000098	quercetin	ALB
MOL000098	quercetin	APOB
MOL000098	quercetin	CASP7
MOL000098	quercetin	CEBPB
MOL000098	quercetin	CXCL2
MOL000098	quercetin	EDN1
MOL000098	quercetin	MAPK9
MOL000098	quercetin	MMP1
MOL000098	quercetin	PLAT
MOL000098	quercetin	SREBF1
MOL000098	quercetin	CDK2
MOL000098	quercetin	CREB1
MOL000098	quercetin	FASLG
MOL000098	quercetin	GSTP1
MOL000098	quercetin	HSPA1A
MOL000098	quercetin	IRS1
MOL000098	quercetin	LDLR
MOL000098	quercetin	PRKCD
MOL000098	quercetin	RUNX2
MOL000098	quercetin	SERPINE1
MOL000098	quercetin	SLC22A6
MOL000098	quercetin	SREBF2
MOL000098	quercetin	TIMP1
MOL000098	quercetin	TOLLIP
MOL000098	quercetin	UGT1A1
MOL000098	quercetin	ABCC4
MOL000098	quercetin	CHUK
MOL000098	quercetin	PDCD4
MOL000098	quercetin	POMC
MOL000098	quercetin	STAT1
MOL000098	quercetin	TFRC
MOL000098	quercetin	TLR7
MOL000098	quercetin	APOA1
MOL000098	quercetin	CASP1
MOL000098	quercetin	CDH1
MOL000098	quercetin	GSK3B
MOL000098	quercetin	HGF
MOL000098	quercetin	JAK2
MOL000098	quercetin	KLK3
MOL000098	quercetin	MIR27A
MOL000098	quercetin	MPO
MOL000098	quercetin	MYC
MOL000098	quercetin	NR1I2
MOL000098	quercetin	PTK2
MOL000098	quercetin	RPS6KB1
MOL000098	quercetin	SLC2A4
MOL002690	hydroxysafflor yellow A	ICAM1
MOL002690	hydroxysafflor yellow A	IL6
MOL002690	hydroxysafflor yellow A	TNF
MOL002690	hydroxysafflor yellow A	VCAM1
MOL002690	hydroxysafflor yellow A	CD40LG
MOL002690	hydroxysafflor yellow A	ITGB3
MOL002690	hydroxysafflor yellow A	MMP9
MOL002690	hydroxysafflor yellow A	PPARG
MOL002690	hydroxysafflor yellow A	PRKACA
MOL002690	hydroxysafflor yellow A	CD40
MOL000211	Mairin	PGR
MOL000239	Jaranol	NOS2
MOL000239	Jaranol	PTGS1
MOL000239	Jaranol	AR
MOL000239	Jaranol	SCN5A
MOL000239	Jaranol	PTGS2
MOL000239	Jaranol	ESR2
MOL000239	Jaranol	DPP4
MOL000239	Jaranol	HSP90AB1
MOL000239	Jaranol	CDK2
MOL000239	Jaranol	CHEK1
MOL000239	Jaranol	PRSS1
MOL000239	Jaranol	NCOA2
MOL000239	Jaranol	NCF1
MOL000296	hederagenin	CYP1A1
MOL000296	hederagenin	CYP1A2
MOL000296	hederagenin	AHR
MOL000296	hederagenin	CYP2B1
MOL000296	hederagenin	CYP2E1
MOL000354	isorhamnetin	NFE2L2
MOL000354	isorhamnetin	TGFB1
MOL000354	isorhamnetin	HMOX1
MOL000354	isorhamnetin	NOS2
MOL000354	isorhamnetin	GCLC
MOL000354	isorhamnetin	PTGS2
MOL000354	isorhamnetin	CYP1A1
MOL000354	isorhamnetin	SERPINE1
MOL000354	isorhamnetin	ACTA2
MOL000354	isorhamnetin	TNF
MOL000354	isorhamnetin	IL1B
MOL000354	isorhamnetin	IL6
MOL000354	isorhamnetin	NCF1
MOL000354	isorhamnetin	PPARG
MOL000354	isorhamnetin	RELA
MOL000354	isorhamnetin	ABCB1
MOL000354	isorhamnetin	AGT
MOL000354	isorhamnetin	BCL2
MOL000354	isorhamnetin	BCL2L1
MOL000354	isorhamnetin	CASP3
MOL000354	isorhamnetin	CAT
MOL000354	isorhamnetin	CCND1
MOL000354	isorhamnetin	COL1A1
MOL000354	isorhamnetin	EDN1
MOL000354	isorhamnetin	NR1I2
MOL000354	isorhamnetin	SMAD3
MOL000354	isorhamnetin	ABCC1
MOL000354	isorhamnetin	AHR
MOL000354	isorhamnetin	AKT1
MOL000354	isorhamnetin	CASP9
MOL000354	isorhamnetin	CCL3
MOL000354	isorhamnetin	CYP1B1
MOL000354	isorhamnetin	CYP3A4
MOL000354	isorhamnetin	ESR1
MOL000354	isorhamnetin	ESR2
MOL000354	isorhamnetin	GPT
MOL000354	isorhamnetin	MIR155
MOL000354	isorhamnetin	NFKBIA
MOL000354	isorhamnetin	NOS3
MOL000354	isorhamnetin	NQO1
MOL000354	isorhamnetin	OLR1
MOL000354	isorhamnetin	PARP1
MOL000354	isorhamnetin	PECAM1
MOL000354	isorhamnetin	PON1
MOL000354	isorhamnetin	PON2
MOL000354	isorhamnetin	PPARD
MOL000354	isorhamnetin	PRKCD
MOL000354	isorhamnetin	PTGES
MOL000354	isorhamnetin	SESN2
MOL000354	isorhamnetin	SMAD2
MOL000387	Bifendate	GPT
MOL000387	Bifendate	TNF
MOL000387	Bifendate	CAT
MOL000387	Bifendate	IL10
MOL000387	Bifendate	TGFB1
MOL000387	Bifendate	IL6
MOL000387	Bifendate	NOS2
MOL000387	Bifendate	PTGS2
MOL000387	Bifendate	RELA
MOL000392	formononetin	CASP3
MOL000392	formononetin	CASP9
MOL000392	formononetin	CASP8
MOL000392	formononetin	ESR2
MOL000392	formononetin	ABCB1
MOL000392	formononetin	ABCC1
MOL000392	formononetin	ABCC2
MOL000392	formononetin	CYP1A1
MOL000392	formononetin	ESR1
MOL000392	formononetin	CCNB1
MOL000392	formononetin	CCND1
MOL000392	formononetin	IL17A
MOL000392	formononetin	TP53
MOL000392	formononetin	AHR
MOL000392	formononetin	BAX
MOL000392	formononetin	BCL2
MOL000392	formononetin	CYP1A2
MOL000392	formononetin	CYP1B1
MOL000392	formononetin	HIF1A
MOL000392	formononetin	IL4
MOL000392	formononetin	NOS3
MOL000392	formononetin	RORA
MOL000392	formononetin	RORC
MOL000392	formononetin	ABCC4
MOL000392	formononetin	ALB
MOL000392	formononetin	CXCL8
MOL000392	formononetin	CYP19A1B
MOL000392	formononetin	CYP2D6
MOL000392	formononetin	EPO
MOL000392	formononetin	HAVCR1
MOL000392	formononetin	MDM2
MOL000392	formononetin	MDM4
MOL000392	formononetin	NFKBIA
MOL000392	formononetin	PPARG
MOL000392	formononetin	SLC22A2
MOL000392	formononetin	UGT1A1
MOL000392	formononetin	UGT1A10
MOL000392	formononetin	UGT1A7
MOL000392	formononetin	UGT1A8
MOL000392	formononetin	UGT1A9
MOL000392	formononetin	VTG1
MOL000398	isoflavanone	IL5
MOL000417	Calycosin	ALB
MOL000417	Calycosin	ACHE
MOL000417	Calycosin	ESR1
MOL000417	Calycosin	ESR2
MOL000417	Calycosin	HIF1A
MOL000417	Calycosin	ABHD14B
MOL000417	Calycosin	BLVRB
MOL000417	Calycosin	CCNB1
MOL000417	Calycosin	CCND3
MOL000417	Calycosin	CCNG1
MOL000417	Calycosin	CDK7
MOL000417	Calycosin	CDKN1A
MOL000417	Calycosin	CDKN1C
MOL000417	Calycosin	CDKN2D
MOL000417	Calycosin	EPO
MOL000417	Calycosin	ERP29
MOL000417	Calycosin	FLT1
MOL000417	Calycosin	HMGB1
MOL000417	Calycosin	KRT1
MOL000417	Calycosin	LASP1
MOL000417	Calycosin	MAPK1
MOL000417	Calycosin	MAPK3
MOL000417	Calycosin	MCM5
MOL000417	Calycosin	MCM6
MOL000417	Calycosin	NME1
MOL000417	Calycosin	PEBP1
MOL000417	Calycosin	PGAM1
MOL000417	Calycosin	PNPO
MOL000417	Calycosin	PRDX1
MOL000417	Calycosin	PRDX2
MOL000417	Calycosin	PRIMA1
MOL000417	Calycosin	RAD9A
MOL000417	Calycosin	RBX1
MOL000417	Calycosin	SKP1
MOL000417	Calycosin	SKP2
MOL000417	Calycosin	STIP1
MOL000417	Calycosin	TAGLN2
MOL000417	Calycosin	UBE3A
MOL000417	Calycosin	UGT1A1
MOL000417	Calycosin	UGT1A10
MOL000417	Calycosin	UGT1A3
MOL000417	Calycosin	UGT1A7
MOL000417	Calycosin	UGT1A8
MOL000417	Calycosin	UGT1A9
MOL000417	Calycosin	UGT2B7
MOL000417	Calycosin	VEGFA
MOL000422	kaempferol	CYP1A1
MOL000422	kaempferol	TNF
MOL000422	kaempferol	ESR1
MOL000422	kaempferol	AHR
MOL000422	kaempferol	NOS2
MOL000422	kaempferol	IL32
MOL000422	kaempferol	ESR2
MOL000422	kaempferol	IL1B
MOL000422	kaempferol	CSF2
MOL000422	kaempferol	CYP1B1
MOL000422	kaempferol	MAPK1
MOL000422	kaempferol	MAPK3
MOL000422	kaempferol	CASP3
MOL000422	kaempferol	HMOX1
MOL000422	kaempferol	PTGS2
MOL000422	kaempferol	ARNT
MOL000422	kaempferol	CYP1A2
MOL000422	kaempferol	PPARG
MOL000422	kaempferol	TP53
MOL000422	kaempferol	NR1I2
MOL000422	kaempferol	ABCC1
MOL000422	kaempferol	CYP3A4
MOL000422	kaempferol	IFNG
MOL000422	kaempferol	IL6
MOL000422	kaempferol	NFE2L2
MOL000422	kaempferol	ABCB1
MOL000422	kaempferol	AKT1
MOL000422	kaempferol	APOE
MOL000422	kaempferol	BAX
MOL000422	kaempferol	BBC3
MOL000422	kaempferol	CCNB1
MOL000422	kaempferol	CXCL8
MOL000422	kaempferol	GREB1
MOL000422	kaempferol	ICAM1
MOL000422	kaempferol	INS1
MOL000422	kaempferol	PGR
MOL000422	kaempferol	TP53I3
MOL000422	kaempferol	AFP
MOL000422	kaempferol	CCL2
MOL000422	kaempferol	CD44
MOL000422	kaempferol	DIO2
MOL000422	kaempferol	JUN
MOL000422	kaempferol	MMP2
MOL000422	kaempferol	PARP1
MOL000422	kaempferol	RELA
MOL000422	kaempferol	SLC2A1
MOL000422	kaempferol	SOD1
MOL000422	kaempferol	SOD2
MOL000422	kaempferol	TFF1
MOL000422	kaempferol	TNFSF11
MOL000422	kaempferol	TSLP
MOL000422	kaempferol	ALOX12
MOL000422	kaempferol	ATM
MOL000422	kaempferol	BCL2L1
MOL000422	kaempferol	BMP2
MOL000422	kaempferol	CASP9
MOL000422	kaempferol	CAT
MOL000422	kaempferol	CCN5
MOL000422	kaempferol	CD14
MOL000422	kaempferol	CDKN1A
MOL000422	kaempferol	CRP
MOL000422	kaempferol	CYCS
MOL000422	kaempferol	CYP2C9
MOL000422	kaempferol	FOS
MOL000422	kaempferol	GADD45B
MOL000422	kaempferol	GCLC
MOL000422	kaempferol	H2AFX
MOL000422	kaempferol	HGF
MOL000422	kaempferol	IL5
MOL000422	kaempferol	ITGAM
MOL000422	kaempferol	MUC5AC
MOL000422	kaempferol	NFKBIA
MOL000422	kaempferol	NQO1
MOL000422	kaempferol	POU5F1
MOL000422	kaempferol	SELE
MOL000422	kaempferol	SFN
MOL000422	kaempferol	SLC16A1
MOL000422	kaempferol	SLCO1B1
MOL000422	kaempferol	SPP1
MOL000422	kaempferol	TP63
MOL000422	kaempferol	TP73
MOL000422	kaempferol	UGT1A1
MOL000422	kaempferol	UGT1A3
MOL000422	kaempferol	XDH
MOL000422	kaempferol	ACTA2
MOL000422	kaempferol	AIP
MOL000422	kaempferol	ALOX5
MOL000422	kaempferol	APP
MOL000422	kaempferol	AR
MOL000422	kaempferol	B3GALT5
MOL000422	kaempferol	BCL2
MOL000422	kaempferol	BCL2A1
MOL000422	kaempferol	BMP4
MOL000422	kaempferol	CALCR
MOL000422	kaempferol	CASP1
MOL000422	kaempferol	CCKAR
MOL000422	kaempferol	CCL5
MOL000422	kaempferol	CCND1
MOL000422	kaempferol	CDK1
MOL000422	kaempferol	CDKN2C
MOL000422	kaempferol	CFTR
MOL000422	kaempferol	CHEK1
MOL000422	kaempferol	CHEK2
MOL000422	kaempferol	CHUK
MOL000422	kaempferol	COL10A1
MOL000422	kaempferol	COL2A1
MOL000422	kaempferol	CYCB
MOL000422	kaempferol	CYP2E1
MOL000422	kaempferol	DHRS4
MOL000422	kaempferol	DUOX1
MOL000422	kaempferol	EP300
MOL000422	kaempferol	FBP1
MOL000422	kaempferol	FN1
MOL000422	kaempferol	GPT
MOL000422	kaempferol	GSTA1
MOL000422	kaempferol	GSTM2
MOL000422	kaempferol	GSTP1
MOL000422	kaempferol	HBB
MOL000422	kaempferol	HIF1A
MOL000422	kaempferol	IL4
MOL000422	kaempferol	KMT2A
MOL000422	kaempferol	LAMB2
MOL000422	kaempferol	MAPK8
MOL000422	kaempferol	MAPK9
MOL000422	kaempferol	MET
MOL000422	kaempferol	MOD2
MOL000422	kaempferol	MT2A
MOL000422	kaempferol	NANOG
MOL000422	kaempferol	NCOA3
MOL000422	kaempferol	NOX4
MOL000422	kaempferol	NR1I3
MOL000422	kaempferol	PPARGC1A
MOL000422	kaempferol	PSCA
MOL000422	kaempferol	PTGES
MOL000422	kaempferol	PYCARD
MOL000422	kaempferol	RIPK1
MOL000422	kaempferol	RPA3
MOL000422	kaempferol	RUNX2
MOL000422	kaempferol	SLC2A4
MOL000422	kaempferol	SLCO1B3
MOL000422	kaempferol	SLCO2B1
MOL000422	kaempferol	SOX9
MOL000422	kaempferol	STAT1
MOL000422	kaempferol	STAT2
MOL000422	kaempferol	TFAM
MOL000422	kaempferol	TGFA
MOL000422	kaempferol	TK1
MOL000422	kaempferol	TNFAIP3
MOL000422	kaempferol	TNFRSF11A
MOL000422	kaempferol	TUBB3
MOL000422	kaempferol	UCP3
MOL000422	kaempferol	UGT1A10
MOL000422	kaempferol	UGT1A7
MOL000422	kaempferol	UGT1A8
MOL000422	kaempferol	UGT1A9
MOL000422	kaempferol	UTRN
MOL000422	kaempferol	VCAM1
MOL000422	kaempferol	VDR
MOL000422	kaempferol	VEGFA
MOL000098	quercetin	TNF
MOL000098	quercetin	CASP3
MOL000098	quercetin	HMOX1
MOL000098	quercetin	IL1B
MOL000098	quercetin	NOS2
MOL000098	quercetin	MAPK3
MOL000098	quercetin	NFE2L2
MOL000098	quercetin	MAPK1
MOL000098	quercetin	AKT1
MOL000098	quercetin	BCL2
MOL000098	quercetin	IL6
MOL000098	quercetin	PTGS2
MOL000098	quercetin	BAX
MOL000098	quercetin	CAT
MOL000098	quercetin	CYP1A1
MOL000098	quercetin	PARP1
MOL000098	quercetin	RELA
MOL000098	quercetin	CASP9
MOL000098	quercetin	TNFSF10
MOL000098	quercetin	IFNG
MOL000098	quercetin	INS1
MOL000098	quercetin	VEGFA
MOL000098	quercetin	TP53
MOL000098	quercetin	MMP9
MOL000098	quercetin	AR
MOL000098	quercetin	CCL2
MOL000098	quercetin	NFKBIA
MOL000098	quercetin	TGFB1
MOL000098	quercetin	CDKN1A
MOL000098	quercetin	CXCL8
MOL000098	quercetin	GCLC
MOL000098	quercetin	JUN
MOL000098	quercetin	CASP8
MOL000098	quercetin	AHR
MOL000098	quercetin	ESR1
MOL000098	quercetin	GSR
MOL000098	quercetin	CCND1
MOL000098	quercetin	ICAM1
MOL000098	quercetin	SOD1
MOL000098	quercetin	BCL2L1
MOL000098	quercetin	FOS
MOL000098	quercetin	HIF1A
MOL000098	quercetin	BIRC5
MOL000098	quercetin	SP1
MOL000098	quercetin	TLR4
MOL000098	quercetin	ABCB1
MOL000098	quercetin	MMP2
MOL000098	quercetin	ABCC1
MOL000098	quercetin	HSPA5
MOL000098	quercetin	AGT
MOL000098	quercetin	DDIT3
MOL000098	quercetin	MCL1
MOL000098	quercetin	NOS3
MOL000098	quercetin	NQO1
MOL000098	quercetin	SOD2
MOL000098	quercetin	STAT3
MOL000098	quercetin	CYP1A2
MOL000098	quercetin	COL1A1
MOL000098	quercetin	EGFR
MOL000098	quercetin	PPARG
MOL000098	quercetin	EGF
MOL000098	quercetin	ESR2
MOL000098	quercetin	TGFA
MOL000098	quercetin	CYP3A4
MOL000098	quercetin	ERBB2
MOL000098	quercetin	INS
MOL000098	quercetin	SIRT1
MOL000098	quercetin	VCAM1
MOL000098	quercetin	ACTA2
MOL000098	quercetin	EGR1
MOL000098	quercetin	PRKAA1
MOL000098	quercetin	BAD
MOL000098	quercetin	CCNB1
MOL000098	quercetin	CTNNB1
MOL000098	quercetin	CXCL10
MOL000098	quercetin	GCLM
MOL000098	quercetin	NCF1
MOL000098	quercetin	NFKB1
MOL000098	quercetin	TNFRSF10B
MOL000098	quercetin	TYR
MOL000098	quercetin	ABCA1
MOL000098	quercetin	BGLAP
MOL000098	quercetin	CYP1B1
MOL000098	quercetin	FASN
MOL000098	quercetin	GPX1
MOL000098	quercetin	HMGB1
MOL000098	quercetin	ALOX15
MOL000098	quercetin	CSF2
MOL000098	quercetin	PPARA
MOL000098	quercetin	CAV1
MOL000098	quercetin	CYP2E1
MOL000098	quercetin	FAS
MOL000098	quercetin	MAPK8
MOL000098	quercetin	MIR21
MOL000098	quercetin	PON1
MOL000098	quercetin	XBP1
MOL000098	quercetin	APP
MOL000098	quercetin	BID
MOL000098	quercetin	CD36
MOL000098	quercetin	CYCS
MOL000098	quercetin	GPT
MOL000098	quercetin	LEP
MOL000098	quercetin	MTOR
MOL000098	quercetin	S100B
MOL000098	quercetin	ALB
MOL000098	quercetin	APOB
MOL000098	quercetin	CASP7
MOL000098	quercetin	CEBPB
MOL000098	quercetin	CXCL2
MOL000098	quercetin	EDN1
MOL000098	quercetin	MAPK9
MOL000098	quercetin	MMP1
MOL000098	quercetin	PLAT
MOL000098	quercetin	SREBF1
MOL000098	quercetin	CDK2
MOL000098	quercetin	CREB1
MOL000098	quercetin	FASLG
MOL000098	quercetin	GSTP1
MOL000098	quercetin	HSPA1A
MOL000098	quercetin	IRS1
MOL000098	quercetin	LDLR
MOL000098	quercetin	PRKCD
MOL000098	quercetin	RUNX2
MOL000098	quercetin	SERPINE1
MOL000098	quercetin	SLC22A6
MOL000098	quercetin	SREBF2
MOL000098	quercetin	TIMP1
MOL000098	quercetin	TOLLIP
MOL000098	quercetin	UGT1A1
MOL000098	quercetin	ABCC4
MOL000098	quercetin	CHUK
MOL000098	quercetin	PDCD4
MOL000098	quercetin	POMC
MOL000098	quercetin	STAT1
MOL000098	quercetin	TFRC
MOL000098	quercetin	TLR7
MOL000098	quercetin	APOA1
MOL000098	quercetin	CASP1
MOL000098	quercetin	CDH1
MOL000098	quercetin	GSK3B
MOL000098	quercetin	HGF
MOL000098	quercetin	JAK2
MOL000098	quercetin	KLK3
MOL000098	quercetin	MIR27A
MOL000098	quercetin	MPO
MOL000098	quercetin	MYC
MOL000098	quercetin	NR1I2
MOL000098	quercetin	PTK2
MOL000098	quercetin	RPS6KB1
MOL000098	quercetin	SLC2A4
MOL000409	AstragalosideIV	HMOX1
MOL000409	AstragalosideIV	ATP2A2
MOL000409	AstragalosideIV	IL1B
MOL000409	AstragalosideIV	IL6
MOL000409	AstragalosideIV	NFE2L2
MOL000409	AstragalosideIV	NFKBIA
MOL000409	AstragalosideIV	NFKBIB
MOL000409	AstragalosideIV	SOD1
MOL000409	AstragalosideIV	SOD2
MOL000409	AstragalosideIV	TNF
MOL000409	AstragalosideIV	BAX
MOL000409	AstragalosideIV	BCS1L
MOL000409	AstragalosideIV	CASP3
MOL000409	AstragalosideIV	MPO
MOL000409	AstragalosideIV	PLN
MOL000409	AstragalosideIV	RELA
MOL000360	Ferulic acid	PTGS1
MOL000360	Ferulic acid	PTGS2
MOL000360	Ferulic acid	NOS3
MOL000360	Ferulic acid	ADRA2A
MOL000360	Ferulic acid	SLC6A2
MOL000360	Ferulic acid	ADRA1A
MOL000360	Ferulic acid	SLC6A3
MOL000360	Ferulic acid	ADRB2
MOL000360	Ferulic acid	LTA4H
MOL000360	Ferulic acid	MAOB
MOL000360	Ferulic acid	MAOA
MOL000360	Ferulic acid	CTRB1
MOL000360	Ferulic acid	ADRA2B
MOL000360	Ferulic acid	PLAU
MOL000360	Ferulic acid	HSP90AB1
MOL000358	beta-sitosterol	PGR
MOL000358	beta-sitosterol	NCOA2
MOL000358	beta-sitosterol	NR3C2
MOL002201	cis-ligustilide	PTGS2
MOL002201	cis-ligustilide	GABRA1
MOL000449	Stigmasterol	NR1H4
MOL000449	Stigmasterol	NR0B1
MOL000449	Stigmasterol	KNG1
MOL000449	Stigmasterol	ZBTB16
MOL000449	Stigmasterol	ABCG5
MOL000449	Stigmasterol	HMGCR
MOL000449	Stigmasterol	ABCG8
MOL000449	Stigmasterol	ACAT1
MOL000449	Stigmasterol	APOA1
MOL000449	Stigmasterol	GFRA1
MOL000449	Stigmasterol	NANOG
MOL000449	Stigmasterol	STRA8
MOL000449	Stigmasterol	ABCB11
MOL000449	Stigmasterol	CLDN11
MOL000449	Stigmasterol	DNMT3L
MOL000449	Stigmasterol	ESR1
MOL000449	Stigmasterol	NOS2
MOL000449	Stigmasterol	NPC1L1
MOL000449	Stigmasterol	TNF
MOL000449	Stigmasterol	ANKRD1
MOL000449	Stigmasterol	BRINP3
MOL000449	Stigmasterol	CXCL8
MOL000449	Stigmasterol	FSHR
MOL000449	Stigmasterol	GABARAP
MOL000449	Stigmasterol	HOXA5
MOL000449	Stigmasterol	IFI35
MOL000449	Stigmasterol	IL10
MOL000449	Stigmasterol	IL6
MOL000449	Stigmasterol	MYBPC2
MOL000449	Stigmasterol	NR0B2
MOL000449	Stigmasterol	PTPN1
MOL000449	Stigmasterol	RPL18A
MOL000449	Stigmasterol	RPL31
MOL000449	Stigmasterol	RPL36
MOL000449	Stigmasterol	RPPH1
MOL000449	Stigmasterol	RPS14
MOL000449	Stigmasterol	RPS27
MOL000449	Stigmasterol	RPS27RT
MOL000449	Stigmasterol	RPS7
MOL000449	Stigmasterol	SLCO1B1
MOL000449	Stigmasterol	PTGS2
MOL000449	Stigmasterol	TM2D3
MOL001002	ellagic acid	ESR1
MOL001002	ellagic acid	AR
MOL001002	ellagic acid	PGR
MOL001002	ellagic acid	HSP90AB1
MOL001002	ellagic acid	RELA
MOL001002	ellagic acid	VEGFA
MOL001002	ellagic acid	CDKN1A
MOL001002	ellagic acid	MMP2
MOL001002	ellagic acid	MMP9
MOL001002	ellagic acid	NFKBIA
MOL001002	ellagic acid	CXCL8
MOL001002	ellagic acid	PRKCB
MOL001002	ellagic acid	GSTP1
MOL001002	ellagic acid	IGF2
MOL001002	ellagic acid	GSTM1
MOL001002	ellagic acid	GSTM2
MOL001002	ellagic acid	GSTA1
MOL001002	ellagic acid	GSTA2
MOL001918	paeoniflorgenone	GABRA1
MOL001924	paeoniflorin	IL6
MOL001924	paeoniflorin	TNF
MOL001924	paeoniflorin	CD14
MOL001924	paeoniflorin	LBP
MOL002714	baicalein	TGFB1
MOL002714	baicalein	CYP1A1
MOL002714	baicalein	AHR
MOL002714	baicalein	CCND1
MOL002714	baicalein	NOS2
MOL002714	baicalein	ACTA2
MOL002714	baicalein	CYP1B1
MOL002714	baicalein	HMOX1
MOL002714	baicalein	RELA
MOL002714	baicalein	AKT1
MOL002714	baicalein	ALOX12
MOL002714	baicalein	CYP1A2
MOL002714	baicalein	BIRC5
MOL002714	baicalein	CDK1
MOL002714	baicalein	CYP3A4
MOL002714	baicalein	MMP9
MOL002714	baicalein	RB1
MOL002714	baicalein	AFP
MOL002714	baicalein	BAX
MOL002714	baicalein	CEBPA
MOL002714	baicalein	CYP2C9
MOL002714	baicalein	EGF
MOL002714	baicalein	GLI1
MOL002714	baicalein	HES1
MOL002714	baicalein	HEY1
MOL002714	baicalein	HEY2
MOL002714	baicalein	HSD11B2
MOL002714	baicalein	INS
MOL002714	baicalein	MAPK1
MOL002714	baicalein	MAPK3
MOL002714	baicalein	MIR21
MOL002714	baicalein	MMP2
MOL002714	baicalein	NAT1
MOL002714	baicalein	NFKBIA
MOL002714	baicalein	NKILA
MOL002714	baicalein	NOTCH1
MOL002714	baicalein	PPARG
MOL002714	baicalein	PTGS2
MOL002714	baicalein	SPRY1
MOL002714	baicalein	SREBF1
MOL002714	baicalein	TNF
MOL002714	baicalein	ABCB1
MOL002714	baicalein	ABCC1
MOL002714	baicalein	ALOX15
MOL002714	baicalein	APP
MOL002714	baicalein	BCL2
MOL002714	baicalein	CASP3
MOL002714	baicalein	CASP8
MOL002714	baicalein	CCNA2
MOL002714	baicalein	CCNB1
MOL002776	Baicalin	F10
MOL000358	beta-sitosterol	PGR
MOL000358	beta-sitosterol	NCOA2
MOL000358	beta-sitosterol	NR3C2
MOL000359	sitosterol	BAX
MOL000359	sitosterol	BCL2
MOL000359	sitosterol	ESR1
MOL000359	sitosterol	ESR2
MOL000359	sitosterol	ABCG5
MOL000359	sitosterol	ABCG8
MOL000359	sitosterol	APOA1
MOL000359	sitosterol	APOB
MOL000359	sitosterol	BIRC2
MOL000359	sitosterol	CASP3
MOL000359	sitosterol	CASP9
MOL000359	sitosterol	CAT
MOL000359	sitosterol	CCL2
MOL000359	sitosterol	CLEC4E
MOL000359	sitosterol	CYCS
MOL000359	sitosterol	FAM102A
MOL000359	sitosterol	IL1B
MOL000359	sitosterol	LDLR
MOL000359	sitosterol	PARP1
MOL004355	Spinasterol	PGR
MOL004355	Spinasterol	NR3C2
MOL004355	Spinasterol	NCOA2
MOL000449	Stigmasterol	NR1H4
MOL000449	Stigmasterol	NR0B1
MOL000449	Stigmasterol	KNG1
MOL000449	Stigmasterol	ZBTB16
MOL000449	Stigmasterol	ABCG5
MOL000449	Stigmasterol	HMGCR
MOL000449	Stigmasterol	ABCG8
MOL000449	Stigmasterol	ACAT1
MOL000449	Stigmasterol	APOA1
MOL000449	Stigmasterol	GFRA1
MOL000449	Stigmasterol	NANOG
MOL000449	Stigmasterol	STRA8
MOL000449	Stigmasterol	ABCB11
MOL000449	Stigmasterol	CLDN11
MOL000449	Stigmasterol	DNMT3L
MOL000449	Stigmasterol	ESR1
MOL000449	Stigmasterol	NOS2
MOL000449	Stigmasterol	NPC1L1
MOL000449	Stigmasterol	PTGS2
MOL000449	Stigmasterol	TNF
MOL000449	Stigmasterol	ANKRD1
MOL000449	Stigmasterol	BRINP3
MOL000449	Stigmasterol	CXCL8
MOL000449	Stigmasterol	FSHR
MOL000449	Stigmasterol	GABARAP
MOL000449	Stigmasterol	HOXA5
MOL000449	Stigmasterol	IFI35
MOL000449	Stigmasterol	IL10
MOL000449	Stigmasterol	IL6
MOL000449	Stigmasterol	MYBPC2
MOL000449	Stigmasterol	NR0B2
MOL000449	Stigmasterol	PTPN1
MOL000449	Stigmasterol	RPL18A
MOL000449	Stigmasterol	RPL31
MOL000449	Stigmasterol	RPL36
MOL000449	Stigmasterol	RPPH1
MOL000449	Stigmasterol	RPS14
MOL000449	Stigmasterol	RPS27
MOL000449	Stigmasterol	RPS27RT
MOL000449	Stigmasterol	RPS7
MOL000449	Stigmasterol	SLCO1B1
MOL000449	Stigmasterol	TM2D3
MOL000492	(+)-catechin	PTGS1
MOL000492	(+)-catechin	PTGS2
MOL000492	(+)-catechin	ESR1
MOL000492	(+)-catechin	HSP90AB1
MOL000492	(+)-catechin	NCOA2
MOL000492	(+)-catechin	CALM1
MOL000492	(+)-catechin	RXRA
MOL006999	stigmast-7-en-3-ol	PGR
MOL002883	Ethyl oleate (NF)	NCOA2
MOL005043	campest-5-en-3beta-ol	BRCA
MOL002140	Perlolyrine	PTGS2
MOL002140	Perlolyrine	RXRA
MOL002157	wallichilide	PTGS2
MOL002157	wallichilide	NR3C2
MOL002157	wallichilide	NR3C1
MOL002157	wallichilide	NCOA2
MOL000359	sitosterol	BAX
MOL000359	sitosterol	BCL2
MOL000359	sitosterol	ESR1
MOL000359	sitosterol	ESR2
MOL000359	sitosterol	ABCG5
MOL000359	sitosterol	ABCG8
MOL000359	sitosterol	APOA1
MOL000359	sitosterol	APOB
MOL000359	sitosterol	BIRC2
MOL000359	sitosterol	CASP3
MOL000359	sitosterol	CASP9
MOL000359	sitosterol	CAT
MOL000359	sitosterol	CCL2
MOL000359	sitosterol	CLEC4E
MOL000359	sitosterol	CYCS
MOL000359	sitosterol	FAM102A
MOL000359	sitosterol	IL1B
MOL000359	sitosterol	LDLR
MOL000359	sitosterol	PARP1
MOL000433	FA	GSK3B
MOL002202	Ligustrazine	VEGFA
MOL002202	Ligustrazine	HIF1AN
MOL002202	Ligustrazine	TBXAS1
MOL002202	Ligustrazine	ITGA2B
MOL002122	Z-ligustilide	HMOX1
MOL002122	Z-ligustilide	KL
MOL002122	Z-ligustilide	NFE2L2
MOL002122	Z-ligustilide	AHR
MOL002122	Z-ligustilide	NQO1
MOL002122	Z-ligustilide	AKT1
MOL002122	Z-ligustilide	CYP1A1
MOL002122	Z-ligustilide	FOXO1
MOL002122	Z-ligustilide	NR1I2
MOL002122	Z-ligustilide	UGT1A1
MOL002122	Z-ligustilide	APP
MOL002122	Z-ligustilide	CASP3
MOL002122	Z-ligustilide	CAT
MOL002122	Z-ligustilide	CYP3A4
MOL002122	Z-ligustilide	HSF1
MOL002122	Z-ligustilide	IGF1R
MOL002122	Z-ligustilide	IRS1
MOL002122	Z-ligustilide	MAPK1
MOL002122	Z-ligustilide	MAPK3
MOL002122	Z-ligustilide	MAPT
MOL002122	Z-ligustilide	SOD2
MOL001323	Sitosterol alpha1	PGR
MOL001323	Sitosterol alpha1	PTGS2
MOL001323	Sitosterol alpha1	GABRA1
MOL001323	Sitosterol alpha1	ADH1C
MOL001323	Sitosterol alpha1	NR3C2
MOL001351	Gibberellin A44	NR3C2
MOL001351	Gibberellin A44	GABRA1
MOL001351	Gibberellin A44	GABRA6
MOL001352	GA54	F10
MOL001352	GA54	PTGS2
MOL001352	GA54	HSP90AB1
MOL001352	GA54	NCOA2
MOL001352	GA54	CALM1
MOL001353	GA60	GABRA2
MOL001353	GA60	GABRA3
MOL001353	GA60	GABRA1
MOL001353	GA60	CHRM2
MOL001353	GA60	GRIA2
MOL001355	GA63	GABRA1
MOL001355	GA63	GRIA2
MOL001355	GA63	GABRA6
MOL001355	GA63	PTGS2
MOL001355	GA63	CHRNA7
MOL001368	3-O-p-coumaroylquinic acid	PTGS1
MOL001368	3-O-p-coumaroylquinic acid	PTGS2
MOL001368	3-O-p-coumaroylquinic acid	CALM1
MOL001368	3-O-p-coumaroylquinic acid	NCOA2
MOL001368	3-O-p-coumaroylquinic acid	HSP90AB1
MOL001368	3-O-p-coumaroylquinic acid	PIK3CG
MOL000296	hederagenin	NCOA2
MOL000296	hederagenin	PGR
MOL000296	hederagenin	CHRM3
MOL000296	hederagenin	CHRM2
MOL000296	hederagenin	CHRM1
MOL000296	hederagenin	GABRA1
MOL000296	hederagenin	GABRA2
MOL000296	hederagenin	GABRA3
MOL000296	hederagenin	GRIA2
MOL000296	hederagenin	ADRA1B
MOL000296	hederagenin	GABRA6
MOL000296	hederagenin	GABRA5
MOL000296	hederagenin	PTGS1
MOL000296	hederagenin	PTGS2
MOL000296	hederagenin	ADH1B
MOL000296	hederagenin	ADH1C
MOL000296	hederagenin	RXRA
MOL000296	hederagenin	SLC6A2
MOL000358	beta-sitosterol	PGR
MOL000358	beta-sitosterol	NCOA2
MOL000358	beta-sitosterol	NR3C2
MOL000493	campesterol	NCOA2
MOL000493	campesterol	PTGS1
MOL000493	campesterol	PTGS2
MOL000493	campesterol	HSP90AB1
MOL000493	campesterol	PGR
MOL000493	campesterol	PIK3CG
MOL001831	Hypoxanthine	PNP
MOL000953	Cholesterol	PGR
MOL000953	Cholesterol	NR3C2
MOL000953	Cholesterol	NCOA2
MOL000131	Linoleic acid	PTGS1
MOL000131	Linoleic acid	PTGS2
MOL000131	Linoleic acid	RXRA
MOL000131	Linoleic acid	NCOA2
MOL000131	Linoleic acid	LYZ
MOL000131	Linoleic acid	SLC6A2
MOL000131	Linoleic acid	IGHG1
MOL000131	Linoleic acid	GABRA1
MOL000131	Linoleic acid	GABRA2
MOL000131	Linoleic acid	CHRM1
MOL000131	Linoleic acid	CHRM2
MOL000131	Linoleic acid	GABRA6
MOL000131	Linoleic acid	TRPV1
MOL005320	Arachidonic acid	PTGS1
MOL005320	Arachidonic acid	PTGS2
MOL005320	Arachidonic acid	NCOA2
MOL005320	Arachidonic acid	RXRG
MOL008698	Dihydrocapsaicin	CASP3
MOL008698	Dihydrocapsaicin	CAT
MOL008698	Dihydrocapsaicin	MAP1LC3A
MOL008698	Dihydrocapsaicin	DDIT3
MOL008698	Dihydrocapsaicin	ERN1
MOL008698	Dihydrocapsaicin	ATF4
MOL008698	Dihydrocapsaicin	CASP4
MOL008698	Dihydrocapsaicin	CASP7
MOL008698	Dihydrocapsaicin	CDKN1A
MOL008698	Dihydrocapsaicin	CYP1A2
MOL008698	Dihydrocapsaicin	CYP2C19
MOL008698	Dihydrocapsaicin	CYP2C9
MOL008698	Dihydrocapsaicin	CYP2D6
MOL008698	Dihydrocapsaicin	CYP2E1
MOL008698	Dihydrocapsaicin	EIF2S1
MOL008698	Dihydrocapsaicin	HSPA5
MOL008698	Dihydrocapsaicin	IGF1
MOL008698	Dihydrocapsaicin	MAPK1
MOL008698	Dihydrocapsaicin	MAPK3
MOL008698	Dihydrocapsaicin	TP53
